# Supplementary material for: Unusual adsorption behaviours and responsive structural dynamics via selective gate effects of an hourglass porous metal–organic framework
Source: Royal Society of Chemistry journal article supplement (doi:10.1039/c9ra07301a), 2019-01-01
Supplement: c9ra07301a1.pdf [file c9ra07301a1.pdf]

## Electronic Supplementary Information

### Exceptional Adsorption Behaviours and Responsive Structural Dynamics *via* Selective Gate Effects of an Hourglass Porous Metal-Organic Framework

Ying Xiong,<sup>[a,b]</sup> Yan-Zhong Fan,<sup>[a]</sup> Zhang-Wen Wei,<sup>[a]</sup> Cheng-Xia Chen,<sup>[a]</sup> Sha Chen,<sup>[a]</sup> Dawei Wang,<sup>[a]</sup> Mihail Barboiu,<sup>[a,c]</sup> Ji-Jun Jiang\*<sup>[a]</sup> and Cheng-Yong Su<sup>[a, d]</sup>

*[a] Lehn Institute of Functional Materials, School of Chemistry, Sun Yat-Sen University, Guangzhou 510275 (P.R. China)*

*[b] Life science institute, Jinzhou Medical University, Jinzhou 121001, (P.R. China)*

*[c] State Key Laboratory of Applied Organic Chemistry Lanzhou University, Lanzhou 730000, P.R. China.*

|                                                                                |    |
|--------------------------------------------------------------------------------|----|
| S1. Presentation of crystal structures .....                                   | 2  |
| S2. TGA Characterization .....                                                 | 3  |
| S3. Powder X-ray Diffraction .....                                             | 3  |
| S4. The structural dynamics of LIFM-12 .....                                   | 5  |
| S5 Gas Selectivity, Adsorption Properties and Adsorption Isothermic Heat ..... | 8  |
| S6 Single Crystal X-Ray Crystallography .....                                  | 10 |

## S1. Presentation of crystal structures

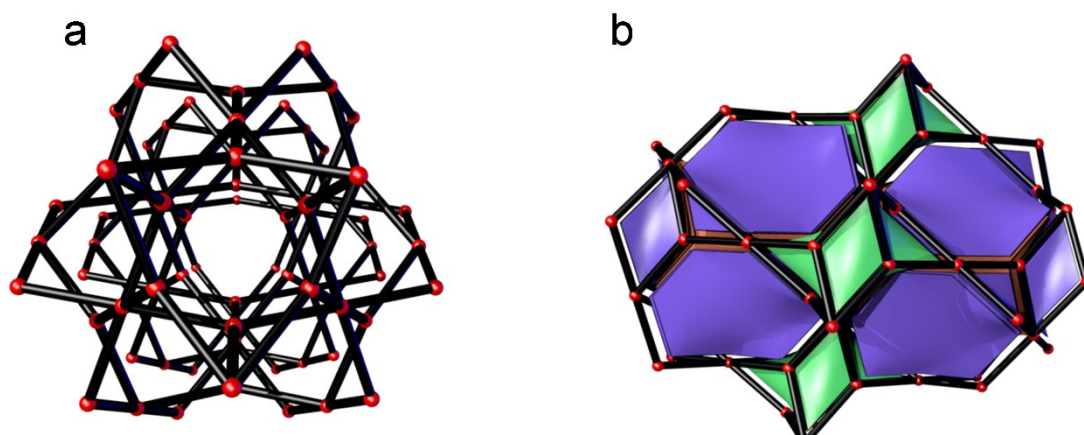

Figure S1. a, ScD<sub>0.33</sub> topology, and b, tiling of LIFM-12

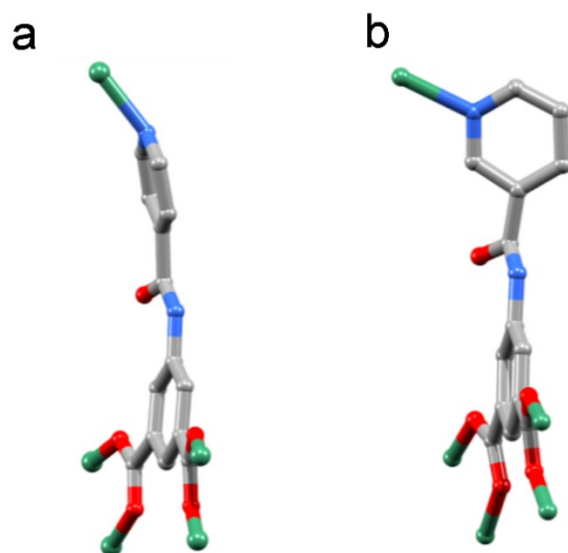

Figure S2. The curving plane of ligand of and coordination model of the ligand of LIFM-12

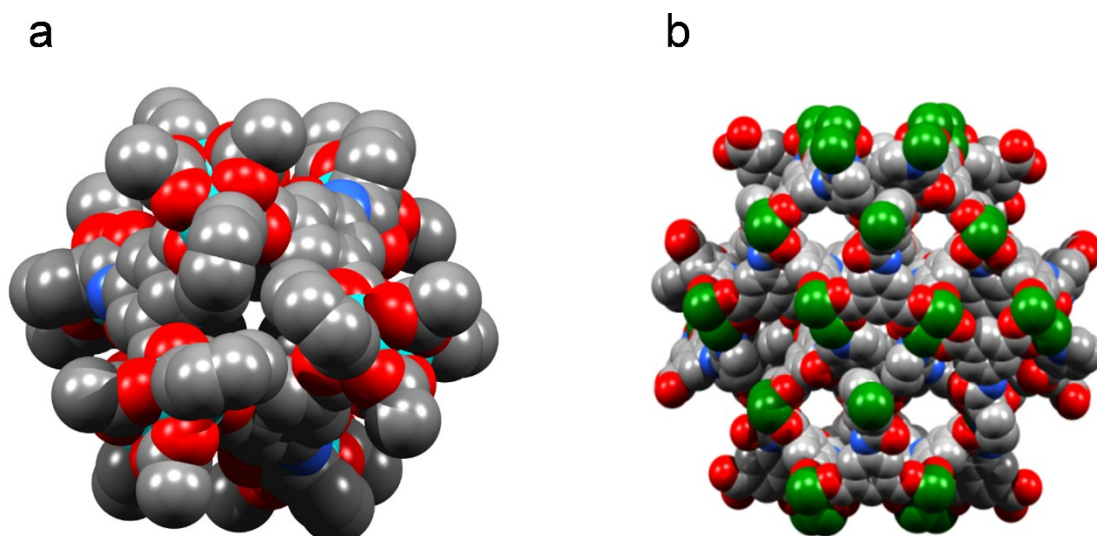

Figure S3. The view of narrow aperture from *c*-axis

## S2. TGA Characterization

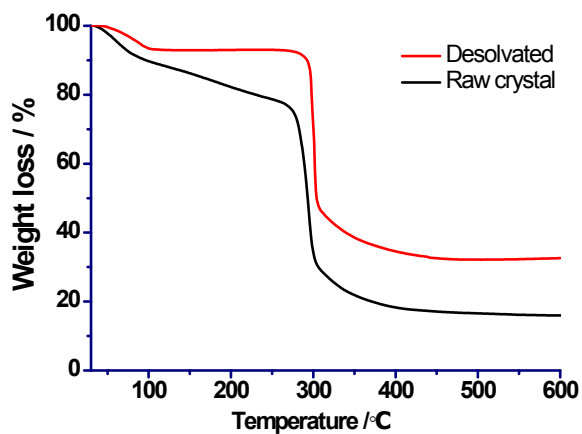

Figure S4. TGA curves of **LIFM-12** and **LIFM-12** in  $N_2$ . The step of **LIFM-12** curve before 100 °C can be arised as that water molecules were re-aborbed by the framework when the desolvated sample transferred to the TGA device

## S3. Powder X-ray Diffraction

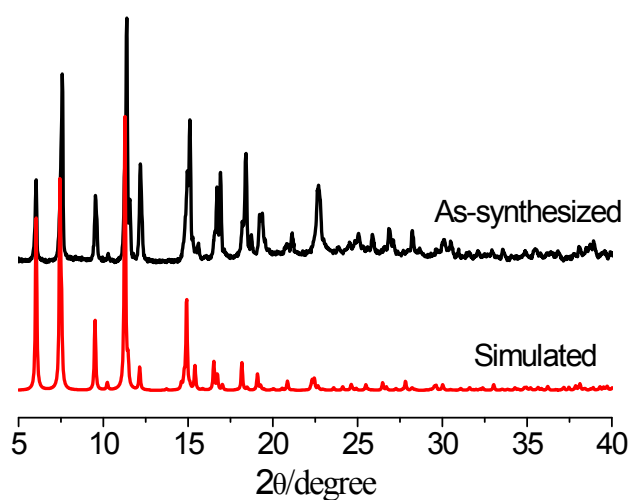

Figure S5. PXRD patterns of as-synthesized **LIFM-12** and simulated result

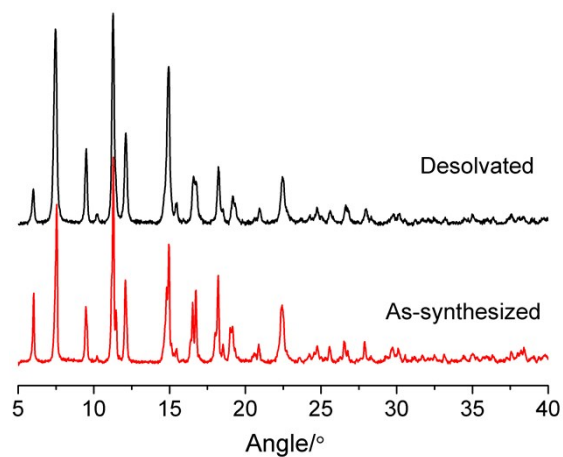

Figure S6. PXRD patterns of as-synthesized **LIFM-12** and its desolvated form, **LIFM-12**

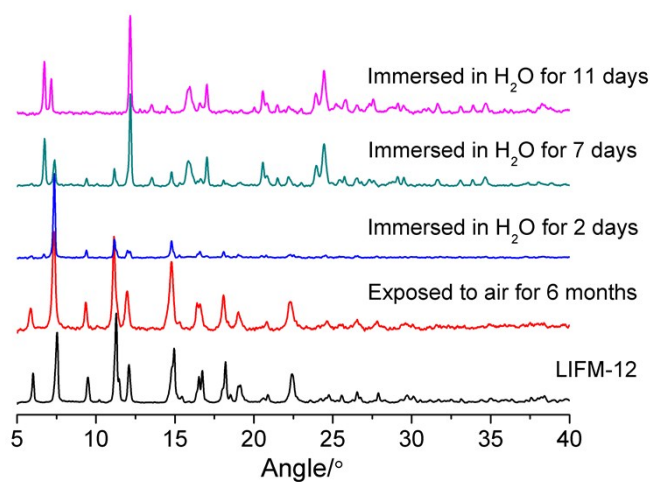

Figure S7. PXRD patterns of **LIFM-12** after exposed to air or immersed in H<sub>2</sub>O

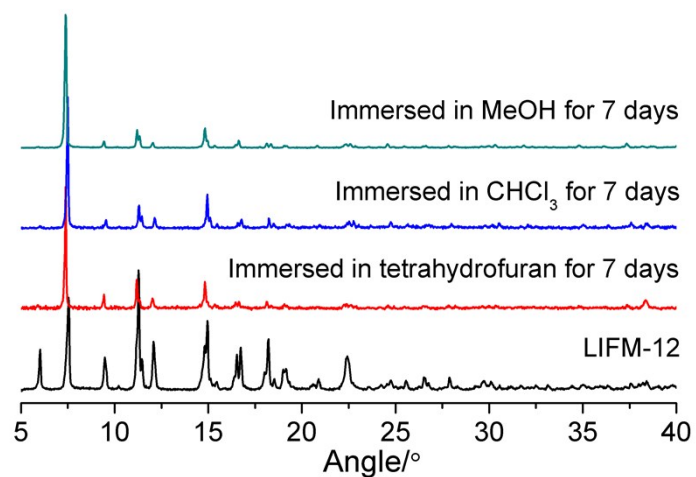

Figure S8. PXRD patterns of **LIFM-12** after immersed in organic solvents

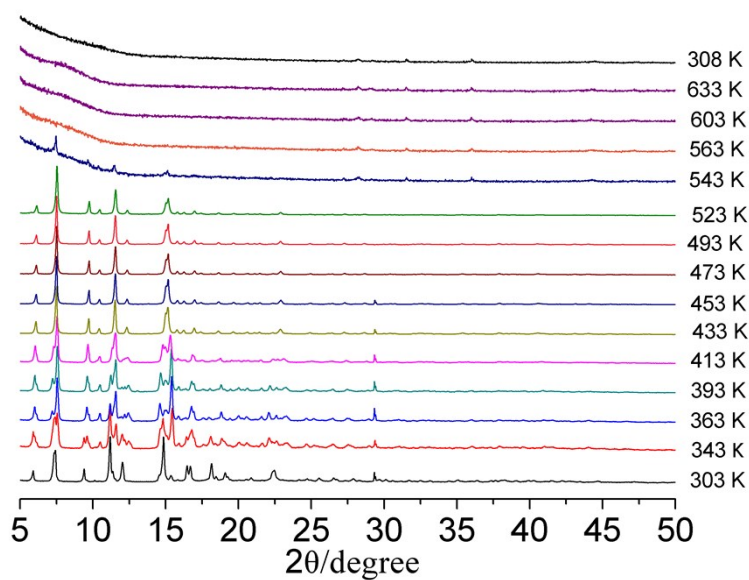

Figure S9 Full spectra of temperature-dependent PXRD patterns

#### S4 The structural dynamics of LIFM-12

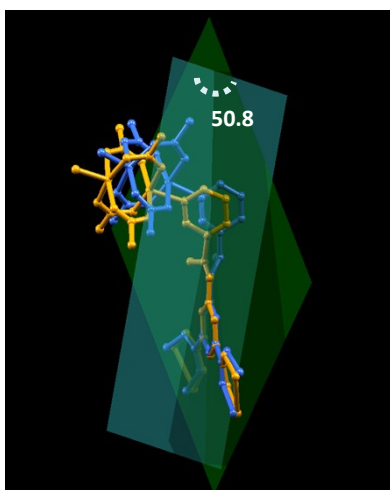

Figure S10 Structural comparing of LIFM-12 and LIFM-12-HT. Yellow structure: LIFM-12. Blue structure LIFM-12-HT

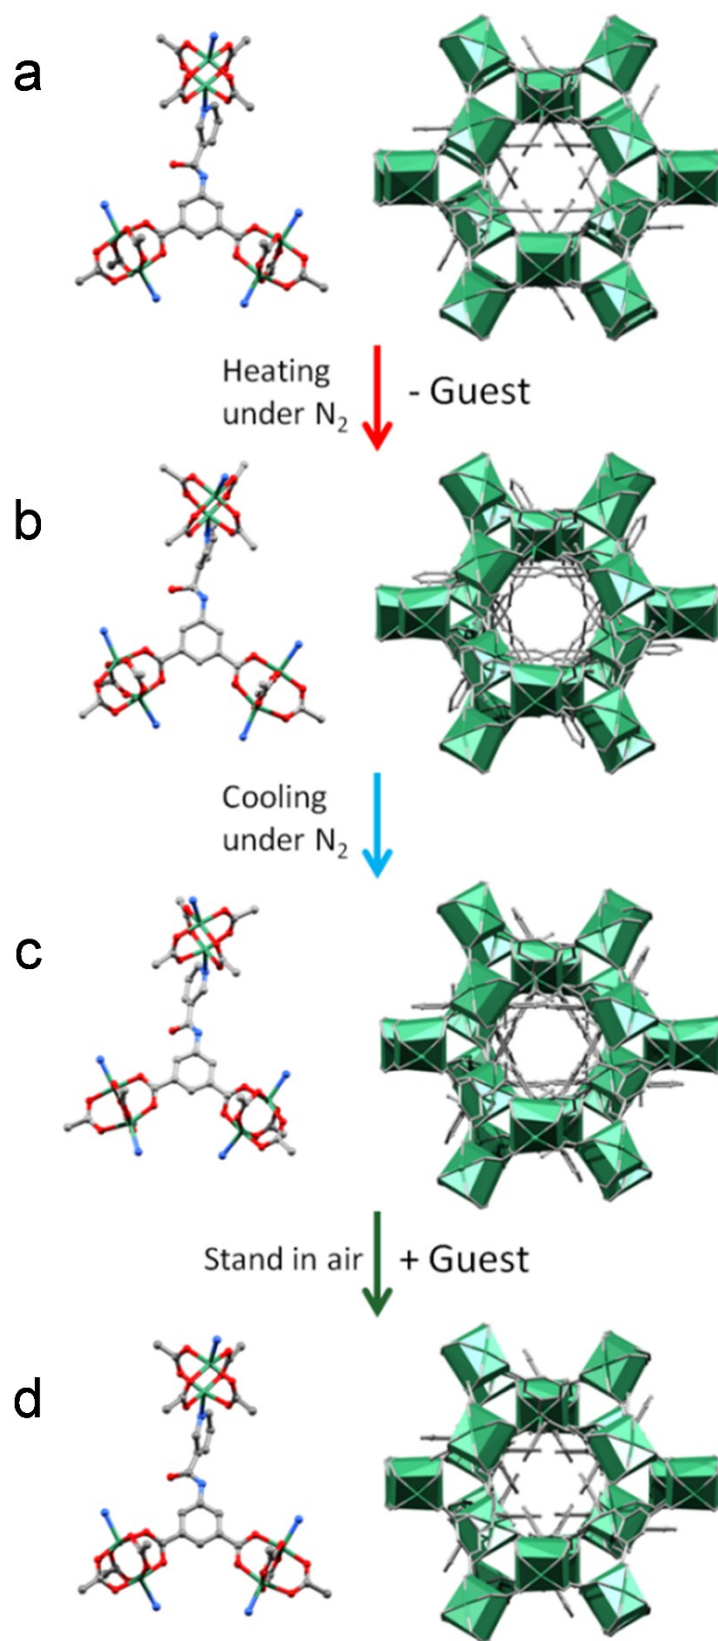

Figure S11 Scheme of *in situ* temperature-dependent PXRD patterns of guest removal and including

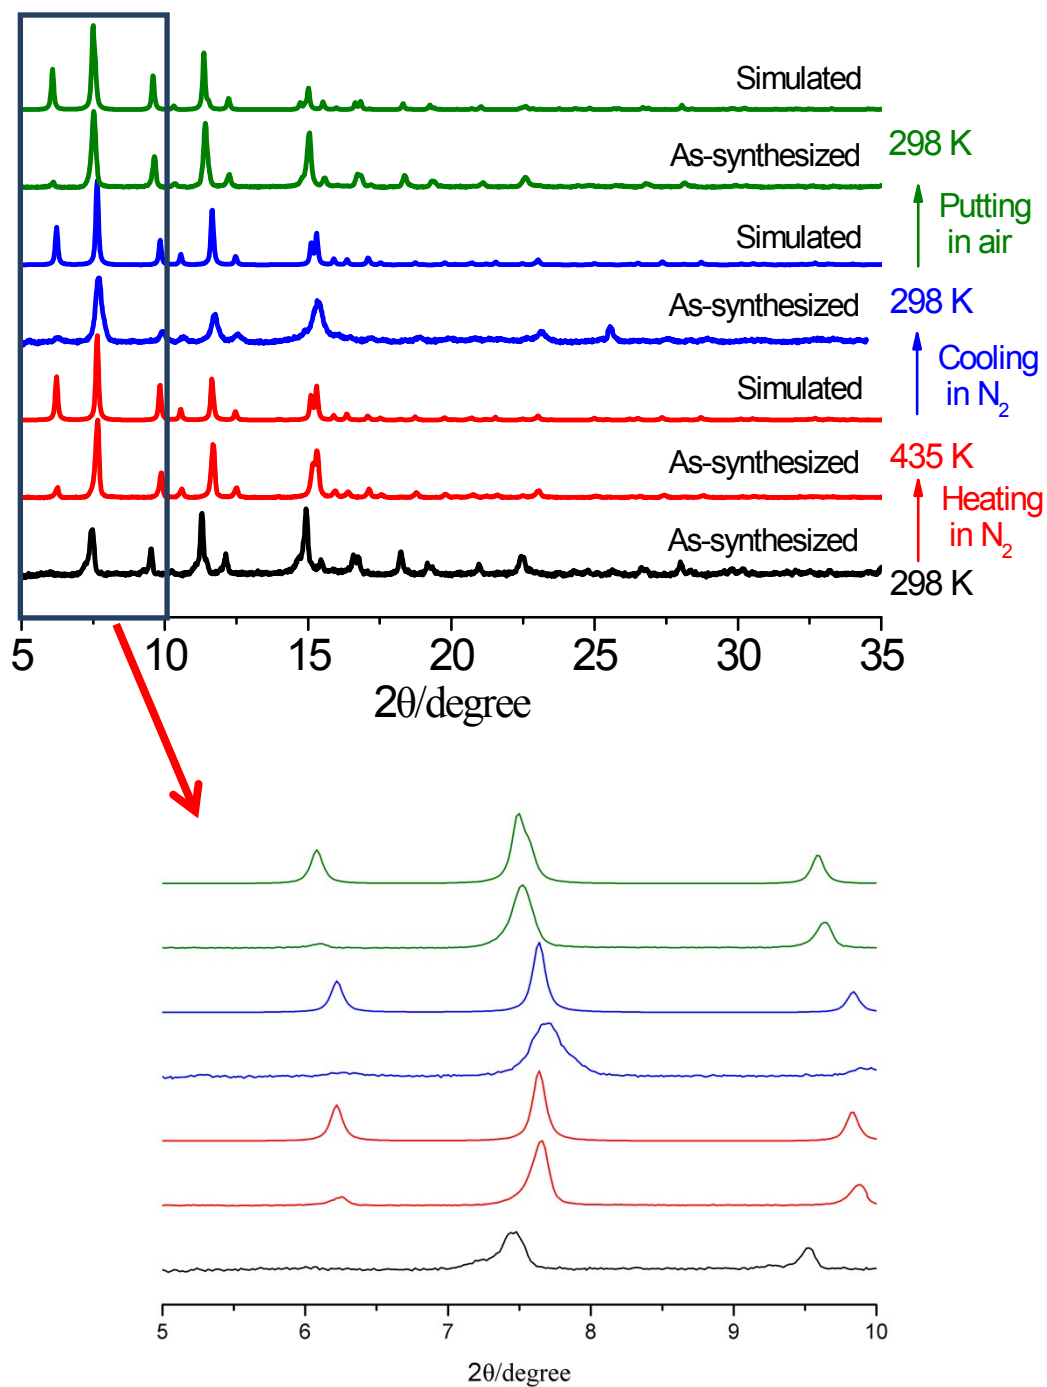

Figure S12 Simulated PXRD patterns from temperature-dependent X-ray single crystal studies of **LIFM-12** (black line), **LIFM-12-HT** (red line), **LIFM-12-LT** (blue line), **LIFM-12-H<sub>2</sub>O** (green line)

### S5 Gas Selectivity, Adsorption Properties and Adsorption Isothermic Heat

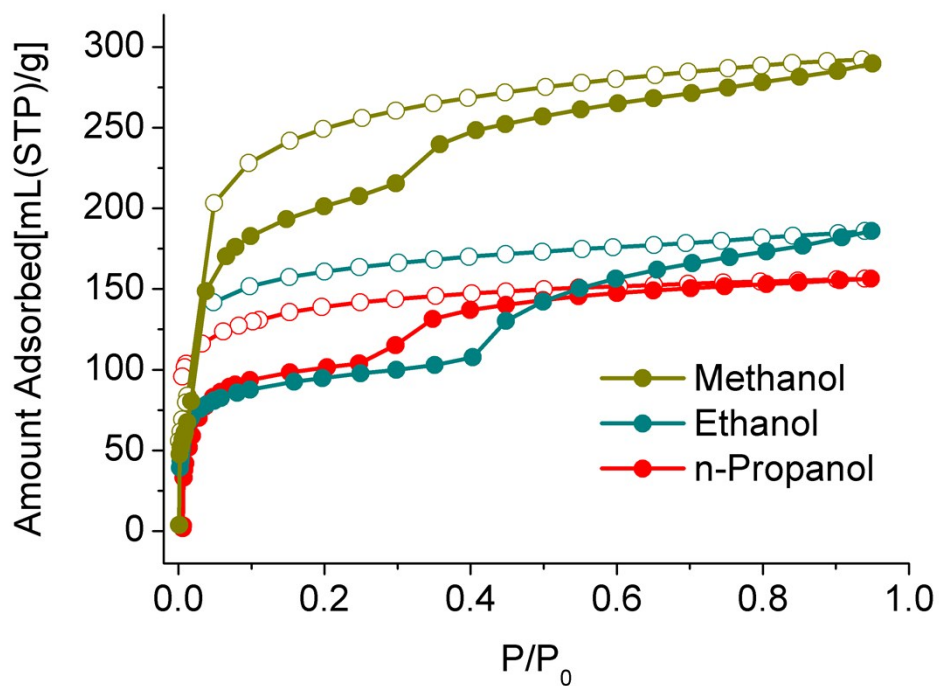

Figure S13 Vapor sorption isotherms of **LIFM-12**

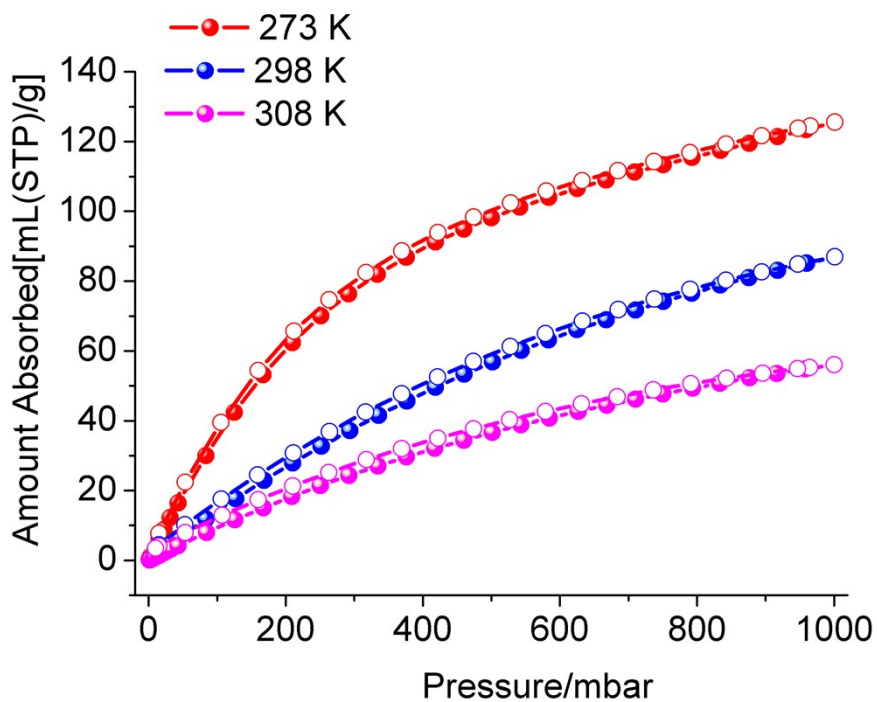

Figure S14 CO<sub>2</sub> sorption isotherms at 273 K, 298 K, 308 K of **LIFM-12**



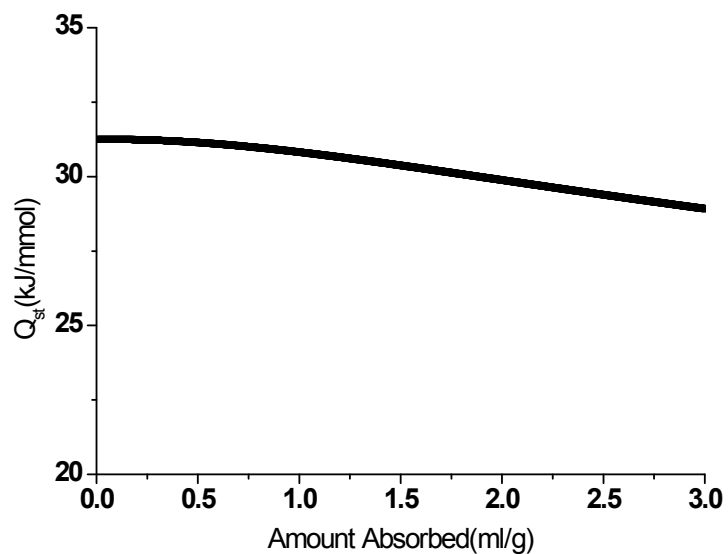

Figure S15 Isothermic heat of CO<sub>2</sub> adsorption of LIFM-12

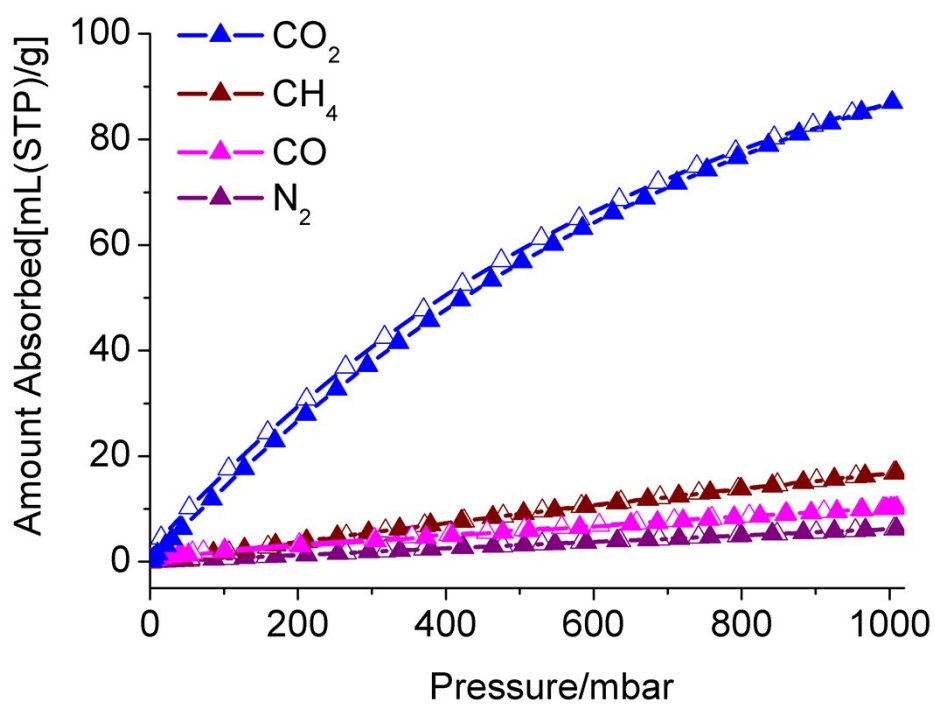

Figure S16 Gas sorption isotherms of LIFM-12 at 298 K

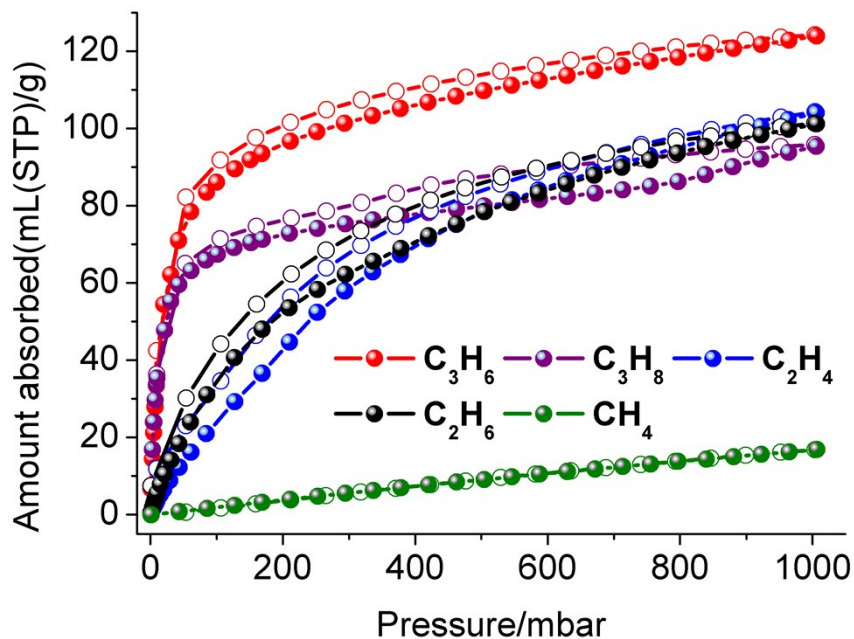

Figure S17 *n*-Alkanes sorption isotherms of LIFM-12 at 298 K

## S6. Single Crystal X-Ray Crystallography

Table S1. Crystallographic Data.

| Compound                                               | LIFM-12                                                        | LIFM-12-HT                                                      | LIFM-12-LT                                                      | LIFM-12-H <sub>2</sub> O                                          |
|--------------------------------------------------------|----------------------------------------------------------------|-----------------------------------------------------------------|-----------------------------------------------------------------|-------------------------------------------------------------------|
| <b>Formula</b>                                         | C <sub>14</sub> CuN <sub>2</sub> O <sub>9</sub> H <sub>8</sub> | C <sub>14</sub> H <sub>8</sub> N <sub>2</sub> O <sub>5</sub> Cu | C <sub>14</sub> H <sub>8</sub> N <sub>2</sub> O <sub>5</sub> Cu | C <sub>14</sub> H <sub>8</sub> N <sub>2</sub> O <sub>6.5</sub> Cu |
| <b>Formula weight</b>                                  | 415.38                                                         | 347.76                                                          | 347.76                                                          | 371.76                                                            |
| <b>Temperature(K)</b>                                  | 150 K                                                          | 435 K                                                           | 298 K                                                           | 298 K                                                             |
| <b>Crystal system</b>                                  | Hexagonal                                                      | Hexagonal                                                       | Hexagonal                                                       | Hexagonal                                                         |
| <b>Space group</b>                                     | $R\bar{3}c$                                                    | $R\bar{3}c$                                                     | $R\bar{3}c$                                                     | $R\bar{3}c$                                                       |
| <b><i>a</i>(Å)</b>                                     | 18.3138(2)                                                     | 17.993(3)                                                       | 17.9678(16)                                                     | 18.4309(18)                                                       |
| <b><i>c</i>(Å)</b>                                     | 69.7479(13)                                                    | 69.267(14)                                                      | 69.263(10)                                                      | 70.011(16)                                                        |
| <b><i>V</i>(Å<sup>3</sup>)</b>                         | 20259.0(6)                                                     | 19420(7)                                                        | 19365(4)                                                        | 20596(6)                                                          |
| <b>Z</b>                                               | 36                                                             | 36                                                              | 36                                                              | 36                                                                |
| <b>Reflections collected</b>                           | 17937                                                          | 8927                                                            | 8016                                                            | 8429                                                              |
| <b>unique reflns</b>                                   | 3570                                                           | 3058                                                            | 2649                                                            | 2909                                                              |
| <b><i>D<sub>c</sub></i> (g·cm<sup>-3</sup>)</b>        | 1.226                                                          | 1.070                                                           | 1.074                                                           | 1.056                                                             |
| <b><i>μ</i>(mm<sup>-1</sup>)</b>                       | 1.749                                                          | 1.594                                                           | 1.599                                                           | 1.556                                                             |
| <b>GOF</b>                                             | 1.108                                                          | 1.161                                                           | 1.245                                                           | 1.299                                                             |
| <b><i>R</i><sub>int</sub></b>                          | 0.0237                                                         | 0.1102                                                          | 0.0741                                                          | 0.0798                                                            |
| <b><i>R</i><sub>1</sub>[<i>I</i>&gt;2σ(<i>I</i>)]</b>  | 0.0787                                                         | 0.1294                                                          | 0.1312                                                          | 0.1314                                                            |
| <b><i>wR</i><sub>2</sub>[<i>I</i>&gt;2σ(<i>I</i>)]</b> | 0.2366                                                         | 0.3374                                                          | 0.3599                                                          | 0.3386                                                            |
| <b><i>R</i><sub>1</sub>(all data)</b>                  | 0.0812                                                         | 0.1962                                                          | 0.1819                                                          | 0.1628                                                            |
| <b><i>wR</i><sub>2</sub>(all data)</b>                 | 0.2405                                                         | 0.3791                                                          | 0.4013                                                          | 0.3783                                                            |
| <b>Data</b>                                            | 0.99                                                           | 0.98                                                            | 0.95                                                            | 0.97                                                              |

**completeness**

Table S2 Selected bond length and angles.

| Compounds | Bond length (Å) |          | Bond angle (°) |            |
|-----------|-----------------|----------|----------------|------------|
| LIFM-12   | Cu1-O3          | 1.944(3) | O3-Cu1-O4      | 88.4(2)    |
|           | Cu1-O4          | 1.973(4) | O3-Cu1-O5      | 89.35(18)  |
|           | Cu1-O5          | 1.993(3) | O3-Cu1-N4      | 94.70(14)  |
|           | Cu1-O6          | 1.927(3) | O4-Cu1-O5      | 164.08(14) |
|           | Cu1-N4          | 2.164(4) | O4-Cu1-N4      | 103.63(14) |
|           |                 |          | O5-Cu1-N4      | 92.27(13)  |
|           |                 |          | O6-Cu1-O3      | 170.76(14) |
|           |                 |          | O6-Cu1-O4      | 89.42(18)  |
|           |                 |          | O6-Cu1-O5      | 90.29(16)  |
|           |                 |          | O6-Cu1-N4      | 94.54(13)  |

Symmetry code for LIFM-12: 1# '-Y,+X-Y,+Z'; 2# '+Y-X,-X,+Z'; 3# '+Y,+X,0.5-Z'; 4# '-X,-X+Y,0.5-Z'; 5# '-Y+X,-Y,0.5-Z'.

|                   |        |          |           |          |
|-------------------|--------|----------|-----------|----------|
| <b>LIFM-12-HT</b> | Cu1-O2 | 2.045(9) | O2-Cu1-N1 | 92.7(4)  |
|                   | Cu1-O3 | 1.886(8) | O3-Cu1-O2 | 92.5(4)  |
|                   | Cu1-O4 | 2.016(9) | O3-Cu1-O4 | 89.1(4)  |
|                   | Cu1-O5 | 1.933(9) | O3-Cu1-O5 | 174.7(3) |
|                   | Cu1-N1 | 2.170(9) | O3-Cu1-N1 | 91.2(3)  |
|                   |        |          | O4-Cu1-O2 | 155.3(4) |
|                   |        |          | O4-Cu1-N1 | 111.9(4) |
|                   |        |          | O5-Cu1-O2 | 88.3(4)  |
|                   |        |          | O5-Cu1-O4 | 87.9(4)  |
|                   |        |          | O5-Cu1-N1 | 94.0(4)  |

Symmetry code for LIFM-12-HT: 1# '-Y,+X-Y,+Z'; 2# '+Y-X,-X,+Z'; 3# '+Y,+X,0.5-Z'; 4# '-Y+X,-Y,0.5-Z'; 5# '-X,-X+Y,0.5-Z'.

|                   |        |          |           |         |
|-------------------|--------|----------|-----------|---------|
| <b>LIFM-12-LT</b> | Cu1-N1 | 2.176(9) | O1-Cu1-N1 | 92.5(3) |
|                   | Cu1-O1 | 2.025(9) | O2-Cu1-N1 | 91.0(3) |

---

|        |          |           |          |
|--------|----------|-----------|----------|
| Cu1-O2 | 1.891(8) | O2-Cu1-O1 | 91.6(4)  |
| Cu1-O3 | 1.930(9) | O2-Cu1-O3 | 175.0(3) |
| Cu1-O4 | 1.999(9) | O2-Cu1-O4 | 90.2(4)  |
|        |          | O3-Cu1-N1 | 93.8(3)  |
|        |          | O3-Cu1-O1 | 89.4(4)  |
|        |          | O3-Cu1-O4 | 86.9(4)  |
|        |          | O4-Cu1-N1 | 111.1(3) |
|        |          | O4-Cu1-O1 | 156.3(3) |

Symmetry code for LIFM-12-LT: 1# '-Y,+X-Y,+Z'; 2# '+Y-X,-X,+Z'; 3# '+Y,+X,0.5-Z'; 4# '-Y+X,-Y,0.5-Z'; 5# '-X,-X+Y,0.5-Z'.

---

|                               |        |          |           |           |
|-------------------------------|--------|----------|-----------|-----------|
| <b>LIFM-12-H<sub>2</sub>O</b> | Cu1-O2 | 1.913(7) | O2-Cu1-O3 | 90.6(3)   |
|                               | Cu1-O3 | 2.018(8) | O2-Cu1-O4 | 89.3(4)   |
|                               | Cu1-O4 | 1.980(8) | O2-Cu1-O5 | 171.9(3)  |
|                               | Cu1-O5 | 1.954(7) | O2-Cu1-N1 | 94(2)     |
|                               | Cu1-N1 | 2.15(6)  | O3-Cu1-N1 | 93.1(16)  |
|                               |        |          | O4-Cu1-O3 | 162.5(3)  |
|                               |        |          | O4-Cu1-N1 | 104.4(17) |
|                               |        |          | O5-Cu1-O3 | 89.3(4)   |
|                               |        |          | O5-Cu1-O4 | 88.4(4)   |
|                               |        |          | O5-Cu1-N1 | 94(2)     |

Symmetry code for LIFM-12-H<sub>2</sub>O: 1# '-Y,+X-Y,+Z'; 2# '+Y-X,-X,+Z'; 3# '+Y,+X,0.5-Z'; 4# '-Y+X,-Y,0.5-Z'; 5# '-X,-X+Y,0.5-Z'.

---

Table S3 Measurement conditions and results of temperature-dependent X-ray single-crystal cycling test

|                               | Temperature (K) | Atmosphere     | Formula                                                                                                                                                 | Space group                 | Unit cell (Å)                       | The solvent accessible volume |
|-------------------------------|-----------------|----------------|---------------------------------------------------------------------------------------------------------------------------------------------------------|-----------------------------|-------------------------------------|-------------------------------|
| <b>LIFM-12</b>                | 150             | N <sub>2</sub> | [Cu(C <sub>14</sub> N <sub>2</sub> O <sub>5</sub> H <sub>8</sub> )]·(C <sub>3</sub> NOH <sub>7</sub> ) <sub>1.33</sub> ·(H <sub>2</sub> O) <sub>2</sub> | <i>R</i> $\bar{3}$ <i>c</i> | a=18.3138<br>c=69.7479<br>V=20259.0 | 51.4%                         |
| <b>LIFM-12-HT</b>             | 435             | N <sub>2</sub> | Cu(C <sub>14</sub> H <sub>7</sub> N <sub>2</sub> O <sub>5</sub> )                                                                                       | <i>R</i> $\bar{3}$ <i>c</i> | a=17.9928<br>c=69.2671<br>V=19420.3 | 45.7%                         |
| <b>LIFM-12-LT</b>             | 298             | N <sub>2</sub> | Cu(C <sub>14</sub> H <sub>7</sub> N <sub>2</sub> O <sub>5</sub> )                                                                                       | <i>R</i> $\bar{3}$ <i>c</i> | a=17.9678<br>c=69.2632<br>V=19365.2 | 46.1%                         |
| <b>LIFM-12-H<sub>2</sub>O</b> | 298             | Air            | (CuC <sub>14</sub> H <sub>7</sub> N <sub>2</sub> O <sub>5</sub> )·2H <sub>2</sub> O                                                                     | <i>R</i> $\bar{3}$ <i>c</i> | a=18.4309<br>c=70.0108<br>V=20596.3 | 52.7%                         |

Table S4 BET surface areas calculated by Ar(87K) and N<sub>2</sub>(77K) of **LIFM-12**

| Gas                       | Solvent surface(m <sup>2</sup> ·g <sup>-1</sup> )                 | Pore volume(cc·g <sup>-1</sup> ) |
|---------------------------|-------------------------------------------------------------------|----------------------------------|
| <b>Ar(87K)</b>            | P/P <sub>0</sub> =0.0063~0.038 c=3288.193 r=0.999997<br>S=950.068 | 0.50                             |
| <b>N<sub>2</sub>(77K)</b> | P/P <sub>0</sub> =0.069~0.089 c=126.117 r=0.999418<br>S=1221.102  | 0.55                             |

Table S5 Summary of some MOFs with high CO<sub>2</sub> sorption amount at 1 bar\*

| MOFs                                                                                                                                           | CO <sub>2</sub> uptake (mmol•g <sup>-1</sup> ) | Reference |
|------------------------------------------------------------------------------------------------------------------------------------------------|------------------------------------------------|-----------|
| Mg-MOF-74                                                                                                                                      | 8.5                                            | (S1,S2)   |
| Cu(Me-4py-trz-ia)                                                                                                                              | 8.3                                            | (S3)      |
| Co-MOF-74                                                                                                                                      | 7.5                                            | (S1)      |
| Zn-MOF-74(296 K)                                                                                                                               | 7.3                                            | (S1)      |
| Ni-MOF-74                                                                                                                                      | 7.1                                            | (S1)      |
| Cu (bpy-1) <sub>2</sub> (SiF <sub>6</sub> )                                                                                                    | 6.8                                            | (S4)      |
| Cu-TDPAT                                                                                                                                       | 5.9                                            | (S5)      |
| {[CuL]·DMF·2H <sub>2</sub> O} <sub>n</sub> **                                                                                                  | 5.0                                            | (S6)      |
| HKUST-1 (295 K)                                                                                                                                | 4.7                                            | (S7)      |
| CuBTTri-mmen                                                                                                                                   | 4.1                                            | (S8)      |
| Bio-MOF-11                                                                                                                                     | 4.1                                            | (S9)      |
| Zn <sub>3</sub> (OH)(p-CDC) <sub>2.5</sub>                                                                                                     | 4.0                                            | (S10)     |
| LIFM-12                                                                                                                                        | 3.9                                            | This work |
| Zn <sub>2</sub> (C <sub>2</sub> O <sub>4</sub> )(C <sub>2</sub> N <sub>4</sub> H <sub>3</sub> ) <sub>2</sub> (H <sub>2</sub> O) <sub>0.5</sub> | 3.78                                           | (S11)     |
| MIL-53(Al)                                                                                                                                     | 2.6                                            | (S12)     |

\*Unless otherwise noted all data were obtained at 298 K. \*\* H<sub>2</sub>L = 5-(4*H*-1,2,4-triazol-4-yl)benzene-1,3-dicarboxylic acid.

Table S6 CO<sub>2</sub>/N<sub>2</sub>, CO<sub>2</sub>/CH<sub>4</sub>, CO<sub>2</sub>/CO Separation Selectivity of LIFM-12.

| Adsorbate       | T/K | Calculated by viral method                               |                                                |                                                | Calculated by IAST method (Zero-converge) |      |
|-----------------|-----|----------------------------------------------------------|------------------------------------------------|------------------------------------------------|-------------------------------------------|------|
|                 |     | $K_H/\text{mol g}^{-1} \text{ torr}^{-1} \times 10^{-3}$ | $a_0/\ln(\text{mol g}^{-1} \text{ torr}^{-1})$ | $b_0/\ln(\text{mol g}^{-1} \text{ torr}^{-1})$ | $S_i$                                     | S    |
| CO <sub>2</sub> | 298 | 0.0671                                                   | -9.60967±0.00311                               | -0.10065±0.00293                               | —                                         | —    |
| N <sub>2</sub>  | 298 | 0.00257                                                  | -12.87129±0.00653                              | 1.09657±0.09888                                | 26.1                                      | 23.2 |
| CH <sub>4</sub> | 298 | 0.00863                                                  | -11.66003±0.00179                              | -0.16586±0.00627                               | 7.8                                       | 7.9  |
| CO              | 298 | 0.0643                                                   | -9.65208±0.05891                               | -33.88577±1.64267                              | 1.0                                       | 1.1  |

Table S7 CH<sub>4</sub>/C<sub>2</sub>H<sub>6</sub>, CH<sub>4</sub>/C<sub>2</sub>H<sub>4</sub>, CH<sub>4</sub>/C<sub>3</sub>H<sub>8</sub> and CH<sub>4</sub>/C<sub>3</sub>H<sub>6</sub> Separation selectivity of LIFM-12

| Adsorbate                     | T/K | Calculated by viral method                               |                                                |                                                | Calculated by IAST method (Zero-converge) |      |
|-------------------------------|-----|----------------------------------------------------------|------------------------------------------------|------------------------------------------------|-------------------------------------------|------|
|                               |     | $K_H/\text{mol g}^{-1} \text{ torr}^{-1} \times 10^{-3}$ | $a_0/\ln(\text{mol g}^{-1} \text{ torr}^{-1})$ | $b_0/\ln(\text{mol g}^{-1} \text{ torr}^{-1})$ | $S_{ij}^*$                                | S    |
| CH <sub>4</sub>               | 298 | 0.00863                                                  | -                                              | -0.16586±0.00627                               | —                                         | —    |
|                               |     |                                                          | 11.66003±0.00179                               |                                                |                                           |      |
| C <sub>2</sub> H <sub>6</sub> | 298 | 0.168                                                    | -8.6911±0.02995                                | -0.33574±0.02766                               | 19.47                                     | 15.2 |

|          |     |       |                  |                  |        |       |
|----------|-----|-------|------------------|------------------|--------|-------|
| $C_2H_4$ | 298 | 0.174 | -8.65446±0.04365 | -1.0293±0.12986  | 20.16  | 27.5  |
| $C_3H_8$ | 298 | 3.49  | -5.65659±0.02376 | -0.50771±0.02197 | 456.55 | 86.8  |
| $C_3H_6$ | 298 | 2.50  | -5.99337±0.02823 | -0.29911±0.02774 | 289.69 | 273.5 |

\*The Henry's law selectivity for gas component i over  $CH_4$  at the speculated temperature is calculated based on equation:  $S_{ij}=K_H(i)/K_H(CH_4)$

### Reference

1. A. Ö. Yazaydın, R. Q. Snurr, T.-H. Park, K. Koh, J. Liu, M. D. LeVan, A. I. Benin, P. Jakubczak, M. Lanuza, D. B. Galloway, J. J. Low and R. R. Willis, *Journal of the American Chemical Society*, 2009, **131**, 18198-18199.
2. S. R. Caskey, A. G. Wong-Foy and A. J. Matzger, *Journal of the American Chemical Society*, 2008, **130**, 10870-10871.
3. D. Lässig, J. Lincke, J. Moellmer, C. Reichenbach, A. Moeller, R. Gläser, G. Kalies, K. A. Cychoz, M. Thommes, R. Staudt and H. Krautscheid, *Angewandte Chemie International Edition*, 2011, **50**, 10344-10348.
4. S. D. Burd, S. Ma, J. A. Perman, B. J. Sikora, R. Q. Snurr, P. K. Thallapally, J. Tian, L. Wojtas and M. J. Zaworotko, *Journal of the American Chemical Society*, 2012, **134**, 3663-3666.
5. B. Li, Z. Zhang, Y. Li, K. Yao, Y. Zhu, Z. Deng, F. Yang, X. Zhou, G. Li, H. Wu, N. Nijem, Y. J. Chabal, Z. Lai, Y. Han, Z. Shi, S. Feng and J. Li, 2012, **51**, 1412-1415.
6. L. Wen, W. Shi, X. Chen, H. Li and P. Cheng, 2012, **2012**, 3562-3568.
7. Q. Min Wang, D. Shen, M. Bülow, M. Ling Lau, S. Deng, F. R. Fitch, N. O. Lemcoff and J. Semanscin, *Microporous and Mesoporous Materials*, 2002, **55**, 217-230.
8. T. M. McDonald, D. M. D'Alessandro, R. Krishna and J. R. Long, *Chemical Science*, 2011, **2**, 2022-2028.
9. J. An, S. J. Geib and N. L. Rosi, *Journal of the American Chemical Society*, 2010, **132**, 38-39.
10. Y.-S. Bae, O. K. Farha, A. M. Spokoyny, C. A. Mirkin, J. T. Hupp and R. Q. Snurr, *Chemical Communications*, 2008, DOI: 10.1039/B805785K, 4135-4137.
11. R. Vaidhyanathan, S. S. Iremonger, K. W. Dawson and G. K. H. Shimizu, *Chemical Communications*, 2009, 5230-5232.
12. B. Arstad, H. Fjellvåg, K. O. Kongshaug, O. Swang and R. J. A. Blom, 2008, **14**, 755-762.
